# Supplementary material for: Engineering a new-to-nature cascade for phosphate-dependent formate to formaldehyde conversion in vitro and in vivo
Source: PubMed Central journal article supplement (PMC10170137; doi:10.1038/s41467-023-38072-w), 2023-05-09
Supplement: 41467_2023_38072_MOESM1_ESM.pdf [file 41467_2023_38072_MOESM1_ESM.pdf]

**Engineering a new-to-nature cascade for phosphate-dependent formate to  
formaldehyde conversion *in vitro* and *in vivo***

Nattermann *et al.*

### **Supplementary Method 1. Synthesis of formic acetic anhydride**

The synthetic procedure described hereafter has been carried out under an argon atmosphere using Schlenk-technique according to a literature procedure.<sup>1</sup> Briefly, sodium formate (1.1 eq., 220 mmol, 14.96 g) was dispersed in dry diethyl ether (50 mL) and cooled to 0 °C. To this slurry, acetyl chloride (1 eq., 200 mmol, 15.698 g) was added dropwise over 25 minutes. The mixture was vigorously stirred at 0 °C for 32 h till acetyl chloride was completely consumed as confirmed by monitoring the reaction via <sup>1</sup>H-NMR. The mixture was filtered and the solid residue washed once with diethyl ether (10 mL). Filtrate and washing solution were combined and the volatiles removed at 0 °C under reduced pressure of 50 mbar. Acetic formic anhydride was obtained as colorless liquid (12.96 g) with a purity of 90.6 % as determined by NMR (impurities: acetic anhydride (3.9 %), acetic acid (1.2 %) and diethyl ether (4.7 %)) (Supplementary Figure 11).

### **Supplementary Method 2. Formyl phosphate synthesis**

To an aqueous solution of dipotassium phosphate (1 mL, 1 M, 1 equiv.), acetic formic anhydride (0.106 g, 1.2 equiv.) was added. The solution was mixed shortly and monitored by <sup>31</sup>P{<sup>1</sup>H}-NMR. The first measurement after 1 minute shows that 59% of dipotassium phosphate was converted to formyl phosphate. The concentration of formyl phosphate linearly decreases at a rate of -1% min<sup>-1</sup> (Supplementary Fig. 12). At the end of the reaction, the pH of the solution was around 4.

The integral ratio of the <sup>31</sup>P{<sup>1</sup>H}-NMR signals was used for quantification. At 0.1 ppm the singlet from dipotassium phosphate is detected, while formyl phosphate shows a singlet at -2.1 ppm (Supplementary Fig. 13). This assignment was confirmed by <sup>31</sup>P-NMR where formyl phosphate shows a doublet at -2.1 ppm ( $J_{\text{PH}}=5.8$  Hz) and in <sup>1</sup>H-NMR a doublet at 8.3 ppm ( $J_{\text{PH}}=5.8$  Hz) for the formyl group (Supplementary Fig. 3). <sup>1</sup>H-<sup>31</sup>P-HMBC-NMR confirmed this assignment (Supplementary Fig. 14). Both doublets become singlets in the respective <sup>1</sup>H{<sup>31</sup>P} and <sup>31</sup>P{<sup>1</sup>H}-NMR decoupled spectra (Supplementary Fig. 13).

### **Supplementary Method 3. Hydrolysis of formyl phosphate under reaction conditions**

The decomposition of formyl phosphate under similar conditions applied in the enzymatic process was investigated. An aliquot of a solution of formyl phosphate prepared as described above (0.1 mL) was added to a solution of MOPS buffer 0.5 M and magnesium chloride 0.01 M (0.9 mL) mixed shortly and directly monitored via <sup>31</sup>P{<sup>1</sup>H}-NMR. The concentration of formyl phosphate linearly decreased at a rate of -0.34 % min<sup>-1</sup>. This experiment confirms that the hydrolytic decomposition is negligible as compared to enzymatic reaction.

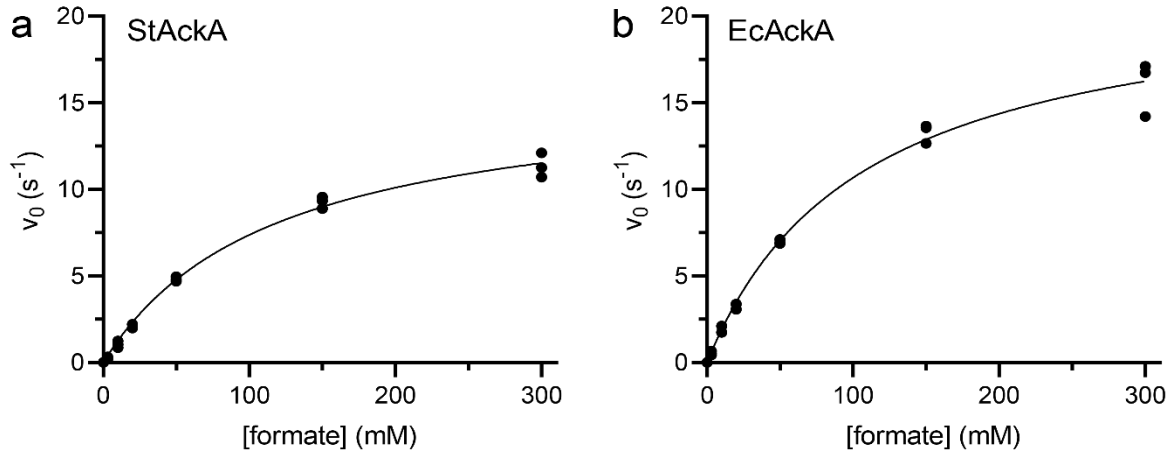

**Supplementary Figure 1. Kinetics for formyl-phosphate synthesis from formate by acetate kinases. a** Kinetic determination of *S. typhimurium* acetate kinase (StAckA). **b** Kinetic determination of *E. coli* acetate kinase (EcAckA). Initial velocity was determined and a Michaelis Menten kinetic was constructed. Individual technical replicates are shown (n=3). Source data are provided as a Source Data file and deposited in Edmond [<https://doi.org/10.17617/3.BKLI0C>].

GapA glyceraldehyde-3-phosphate dehydrogenase

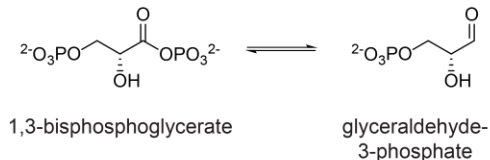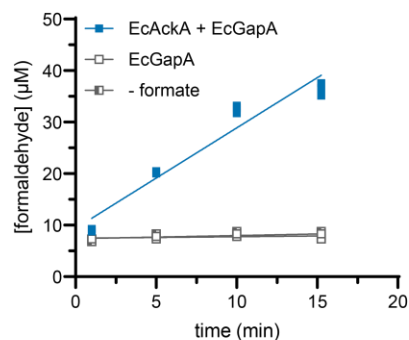

ArgC N-acetyl-gamma-glutamyl phosphate reductase

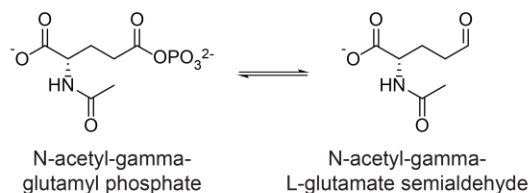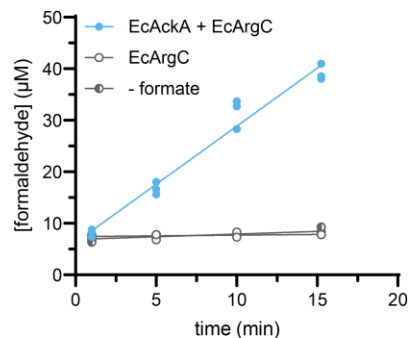

ASD aspartate-semialdehyde dehydrogenase

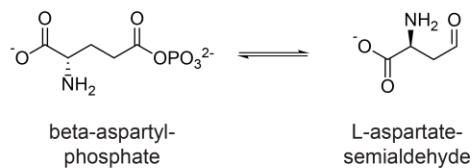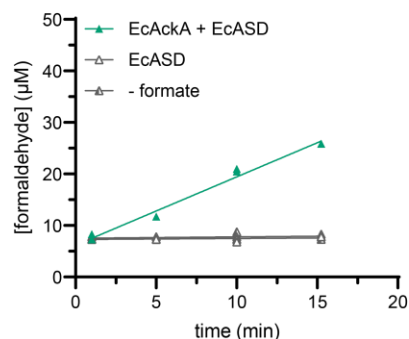

ProA gamma-glutamyl phosphate reductase

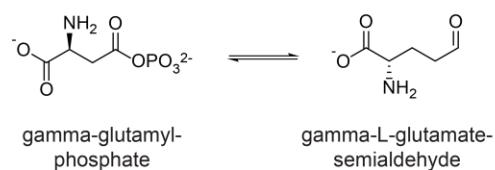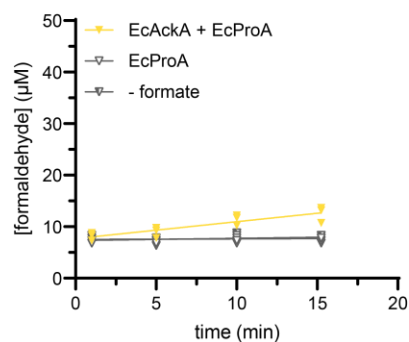

**Supplementary Figure 2. Native function and promiscuous activities of formyl phosphate reductase candidates.** Native reactions are given. Graphs depict formyl phosphate reductase activity and relevant controls. Formyl phosphate was produced *in situ* by *E. coli* acetate kinase (EcAckA). Shown is the linear fit of individual technical replicates (n = 3). Source data are provided as a Source Data file.

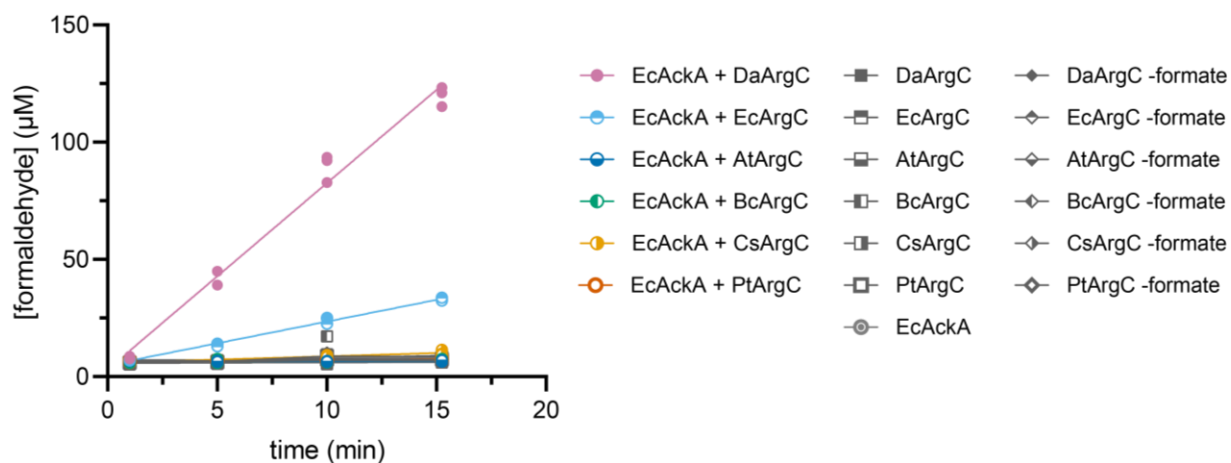

**Supplementary Figure 3. Formaldehyde production by ArgC homologs.** Formaldehyde production by EcAckA+XxArgC *in vitro* including relevant controls. Formaldehyde was detected by Nash assay. Shown is the linear fit of independent technical triplicates (n=3). EcAckA: *Escherichia coli* acetate kinase, AtArgC: *Arabidopsis thaliana* N-acetyl- $\gamma$ -glutamyl phosphate dehydrogenase, BcArgC: *Bacillus clausii* N-acetyl- $\gamma$ -glutamyl phosphate dehydrogenase, CsArgC: *Caldicellulosiruptor saccharolyticus* N-acetyl- $\gamma$ -glutamyl phosphate dehydrogenase, DaArgC: *Denitrovibrio acetiphilus* N-acetyl- $\gamma$ -glutamyl phosphate dehydrogenase, EcArgC: *Escherichia coli* N-acetyl- $\gamma$ -glutamyl phosphate dehydrogenase, PtArgC: *Pseudidiomarina taiwanensis* N-acetyl- $\gamma$ -glutamyl phosphate dehydrogenase. Source data are provided as a Source Data file.

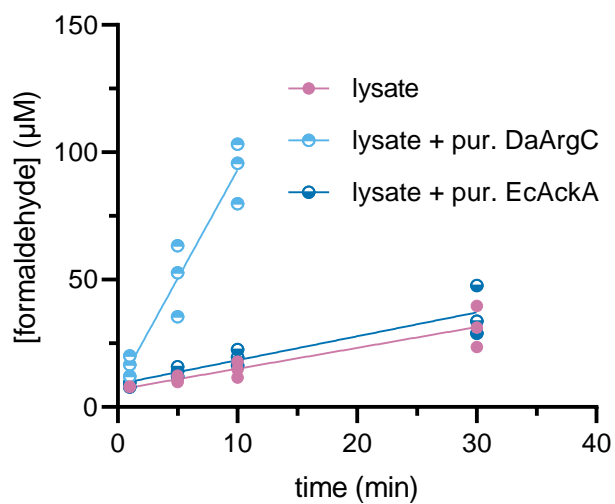

**Supplementary Figure 4. Lysate activity of EcAckA+DaArgC.** Activity of EcAckA+DaArgC in bacterial lysate. Shown are productivities with and without addition of 5  $\mu\text{M}$  purified enzyme. Shown are a linear fit and individual measurements of independent biological replicates ( $n=3$ ). EcAckA: *Escherichia coli* acetate kinase, DaArgC: *Denitrovibrio acetiphilus* N-acetyl- $\gamma$ -glutamyl phosphate dehydrogenase. Source data are provided as a Source Data file.

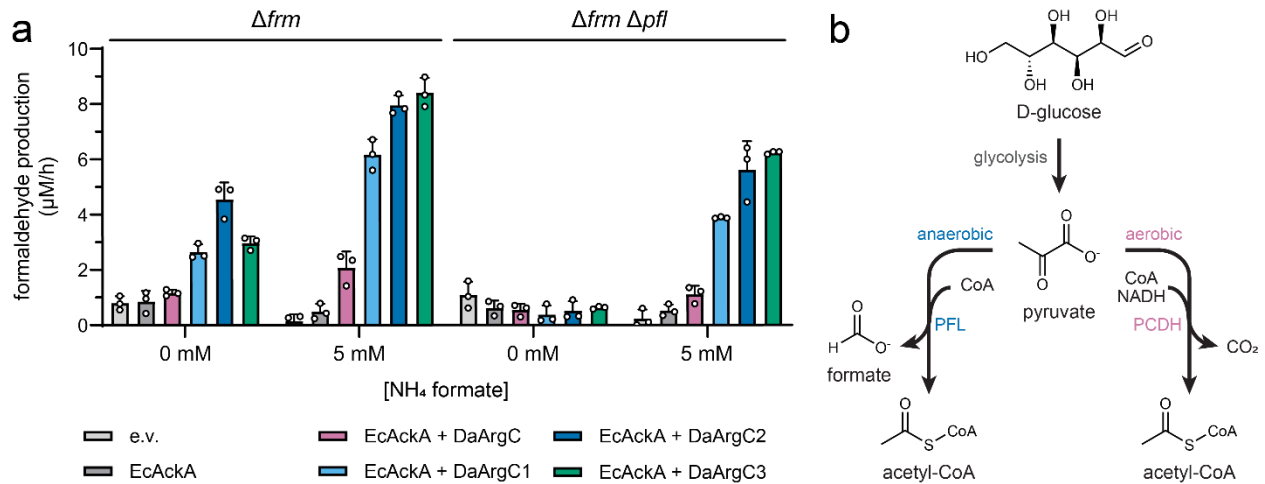

**Supplementary Figure 5. Background formate production by PFL in BL21 DE3. a** Background formaldehyde production in BL21 DE3  $\Delta frmRAB$  and BL21 DE3  $\Delta frmRAB \Delta pflAB$  on 0 mM and 5 mM formate. Shown are mean with standard deviation and individual measurements. Data points represent independent biological replicates (n=3). **b** Metabolic network of *E. coli* from glucose to acetyl-CoA. In anaerobic conditions, PFL produces formate and acetyl-CoA from pyruvate. EcAckA: *Escherichia coli* acetate kinase, DaArgC: *Denitrovibrio acetiphilus* N-acetyl- $\gamma$ -glutamyl phosphate dehydrogenase. PFL: pyruvate formate lyase. PCDH: pyruvate dehydrogenase. Source data are provided as a Source Data file.

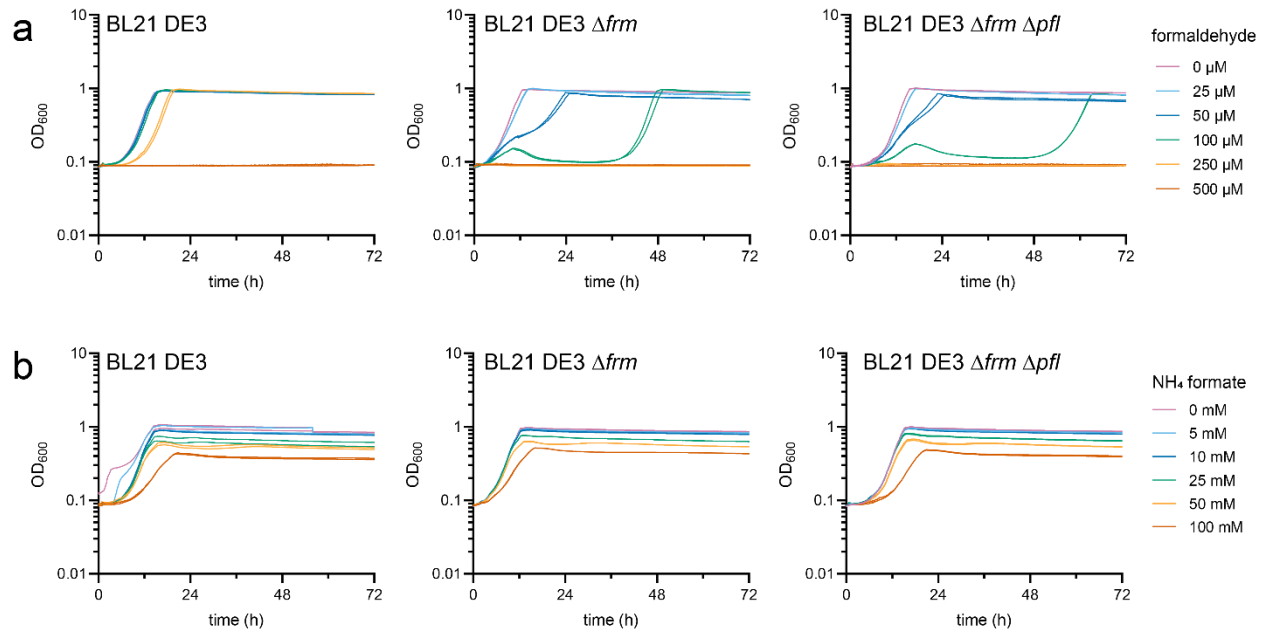

**Supplementary Figure 6. Cell survival in the presence formate and formaldehyde.** Toxicity of formaldehyde (**a**) and ammonium formate (**b**) on the growth of *E. coli* BL21 DE3 deficient in formaldehyde detoxification system *frmRAB* and/or pyruvate formate lyase *pflAB*. Shown are individual independent biological replicates (n=2). Source data are provided as a Source Data file.



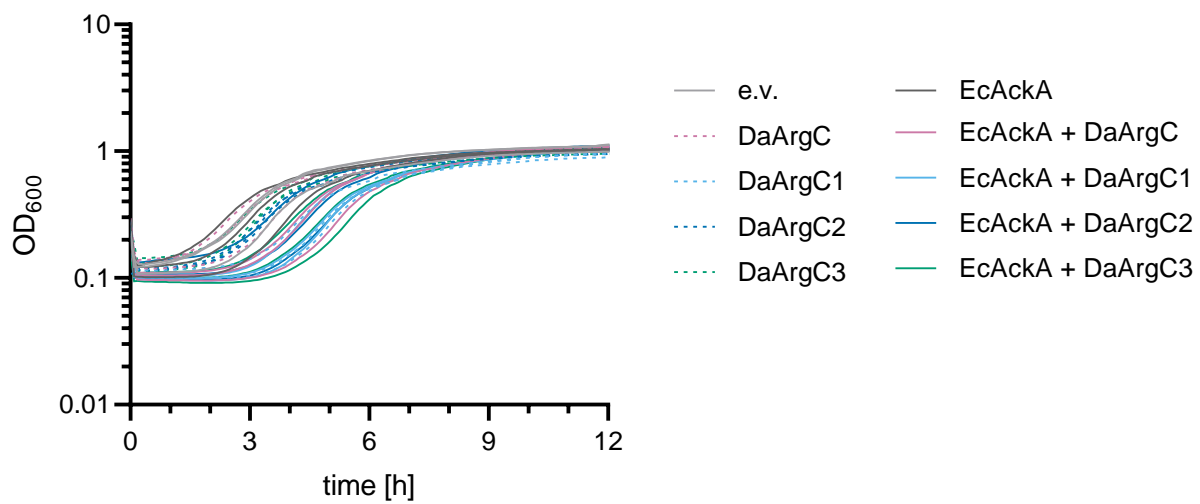

**Supplementary Figure 7. Rescue of cells after assay.** Rescue in LB of BL21DE3  $\Delta frmRAB$  cells carrying EcAckA and/or DaArgC variants after assay conditions (overexpression followed by 4 h incubation with 50 mM formate). Shown are mean and standard deviation of independent biological replicates (n=3). EcAckA: *Escherichia coli* acetate kinase, DaArgC: *Denitrovibrio acetiphilus* N-acetyl- $\gamma$ -glutamyl phosphate dehydrogenase. Source data are provided as a Source Data file.



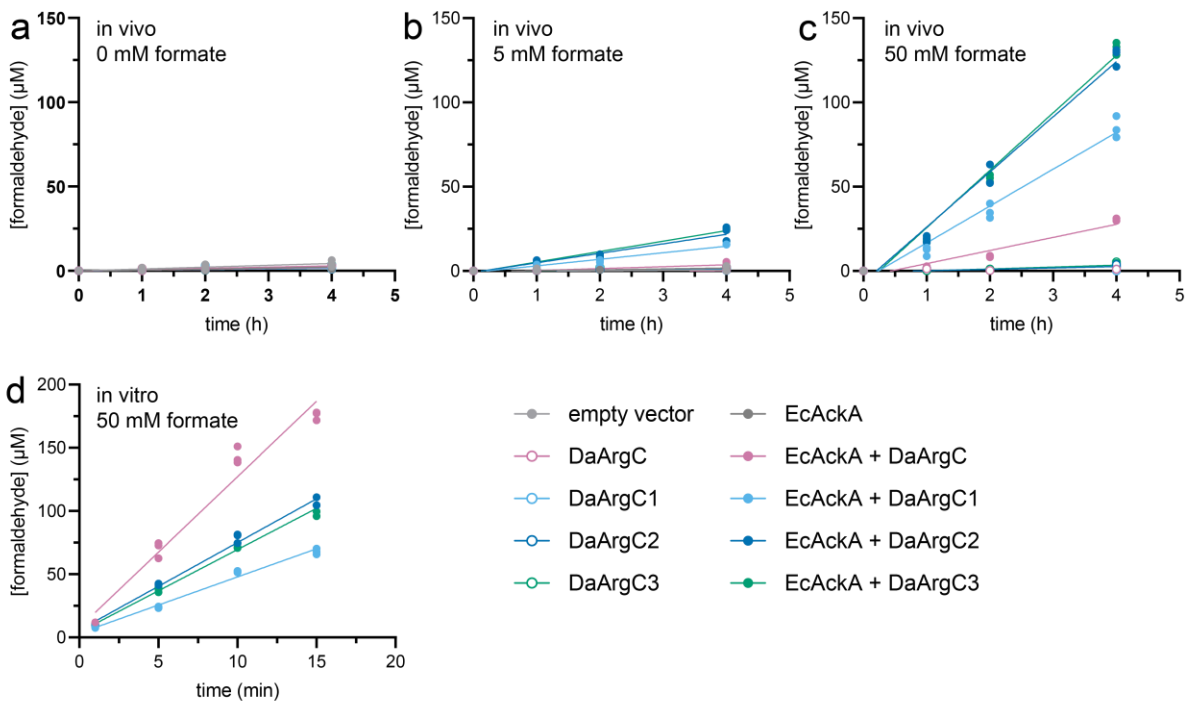

**Supplementary Figure 9. Production plots of EcAckA+DaArgC with DaArgC variants.** Formaldehyde concentration was determined by Nash assay. Shown are individual biological (**a-c**) or technical (**d**) replicates and linear fit ( $n=3$ ). **a-c** *in vivo* activity on 0 mM, 5 mM, 50 mM ammonium formate. **d** activity of purified variants supplemented with 50 mM ammonium formate. EcAckA: *Escherichia coli* acetate kinase, DaArgC: *Denitrovibrio acetiphilus* N-acetyl- $\gamma$ -glutamyl phosphate dehydrogenase. Source data are provided as a Source Data file.

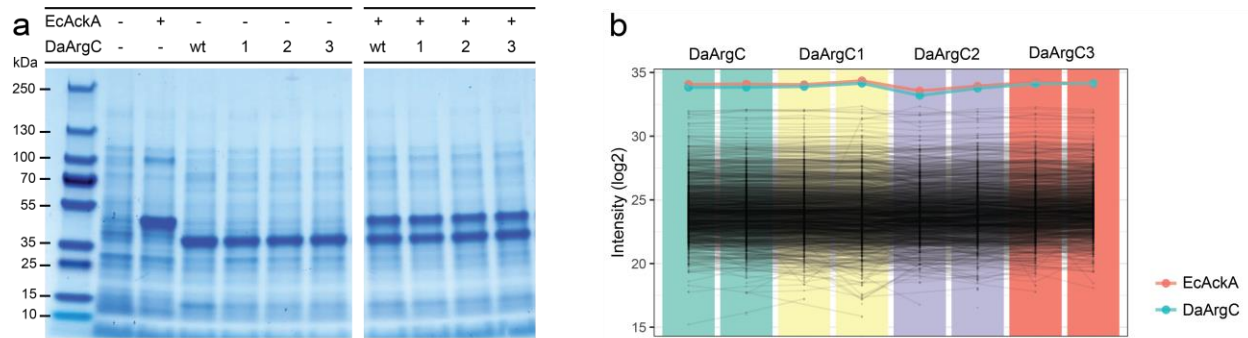

**Supplementary Figure 10. *In vivo* titer of DaArgC variants does not change with acquired mutations.**

**a** SDS-Page of protein production in BL21DE3  $\Delta frmRAB \Delta pflAB$ . Both sectors belong to the same gel. Two irrelevant bands were cropped out.  $m(\text{EcAckA})=46$  kDa,  $m(\text{DaArgC})=38$  kDa. The gel is a representative image for independent biological replicates ( $n=2$ ). **b** Proteomic analysis of protein production in BL21DE3  $\Delta frmRAB \Delta pflAB$ . Colored sectors indicate independent biological replicates of cultures expressing the same variant ( $n=2$ ). Abundance for all shared peptides between the DaArgC variants is indicated as a colored line. Abundance of unrelated peptides are shown in black. EcAckA: *Escherichia coli* acetate kinase, DaArgC: *Denitrovibrio acetiphilus* N-acetyl- $\gamma$ -glutamyl phosphate dehydrogenase. Source data are provided as a Source Data file.

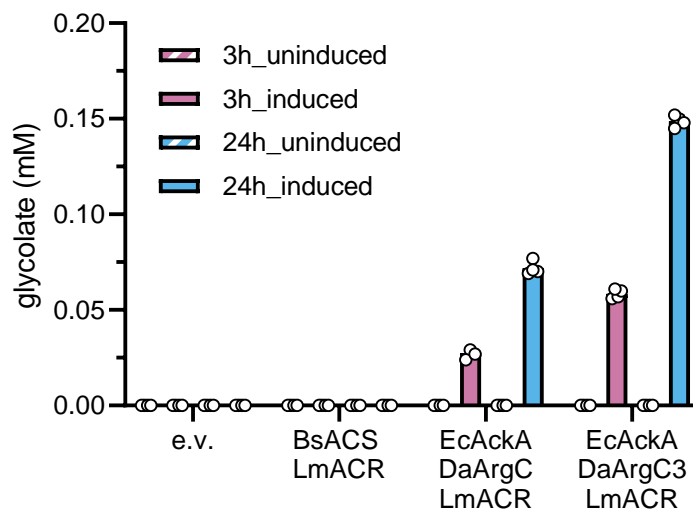

**Supplementary Figure 11. Controls for resting cell bioconversion of formate to glycolate.** Show is the mean and standard error of biological replicates (n=4) as well as individual measurements. BsACS: *Bacillus subtilis* acetyl-CoA synthase, EcAckA: *Escherichia coli* acetate kinase, DaArgC: *Denitrovibrio acetiphilus* N-acetyl- $\gamma$ -glutamyl phosphate dehydrogenase, LmACR: *Listeria monocytogenes* acyl-CoA reductase. Source data are provided as a Source Data file.

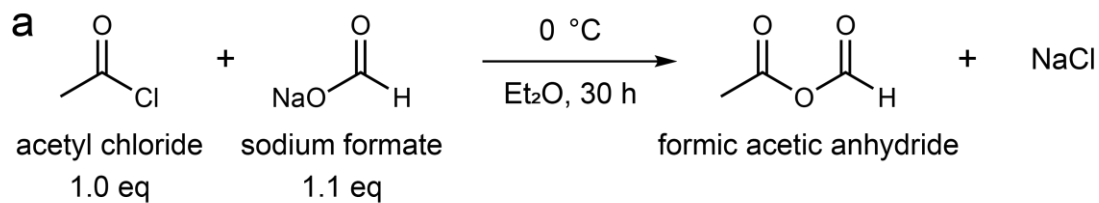

**b**

| Compound           | Integral  | Molar ratio [%] |
|--------------------|-----------|-----------------|
| Formic acetic anh. | 83.83     | 90.6            |
| Acetic anh.        | 6.43 (/2) | 3.5             |
| Acetic acid        | 1.13      | 1.2             |
| Diethyl ether      | 8.61(/2)  | 4.7             |

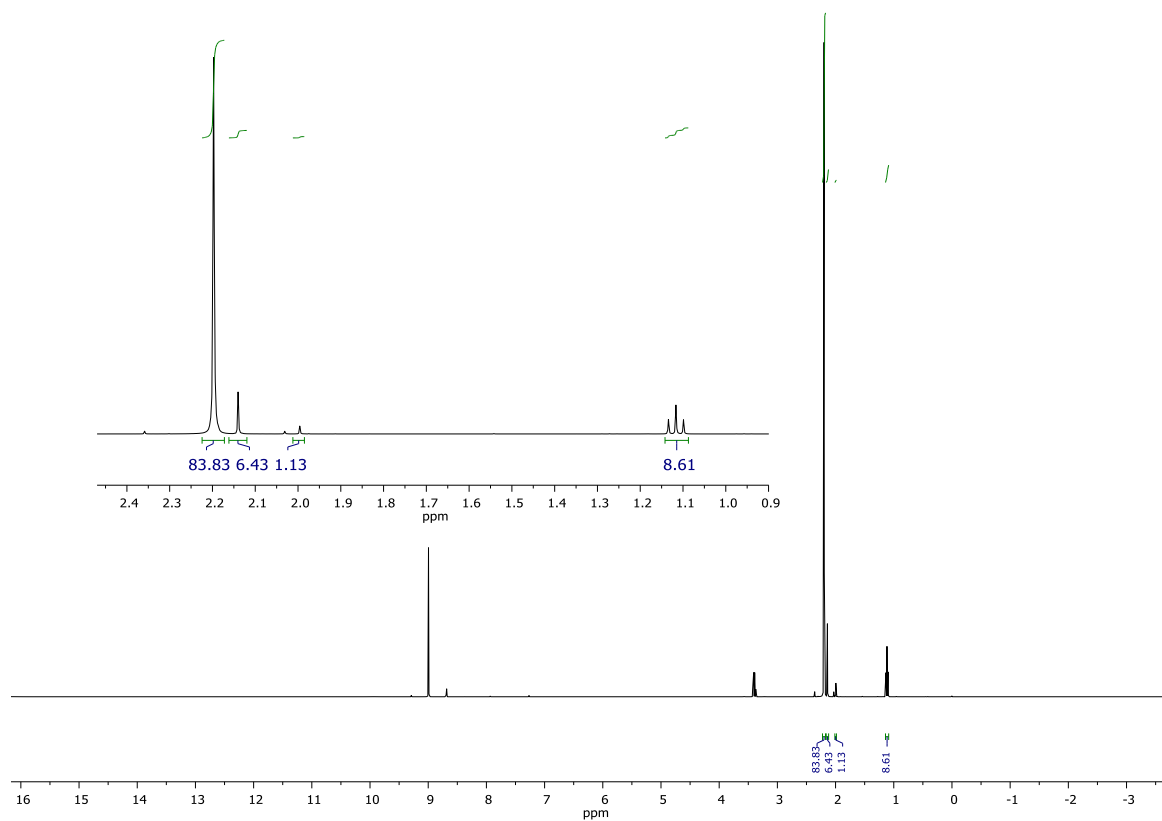

**Supplementary Figure 12. Synthesis of formic acetic anhydride.** **a** Reaction conditions for the synthesis of formic acetic anhydride. **b**  $^1\text{H-NMR}$  of reaction mixture. Formic acetic anhydride shows a signal at 2.2 ppm for its  $\text{CH}_3$  group and at 8.99 ppm for its CH group. Diethyl ether shows a triplet at 1.12 ppm and a quartet at 3.4 ppm. Side products are acetic acid at 2.00 ppm ( $\text{CH}_3$ ), acetic anhydride at 2.14 ppm ( $\text{CH}_3$ ) and residual signals exist for acetyl chloride (2.36 ppm) and sodium formate (8.68 ppm).

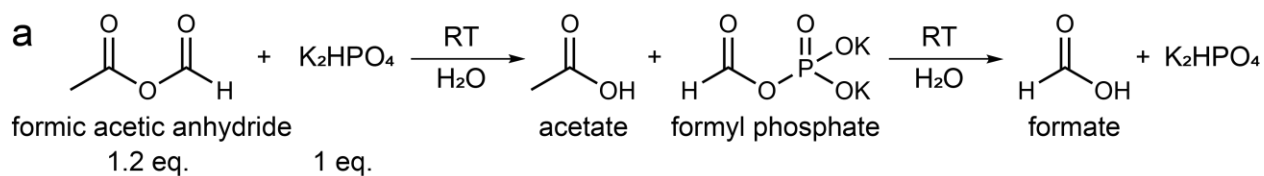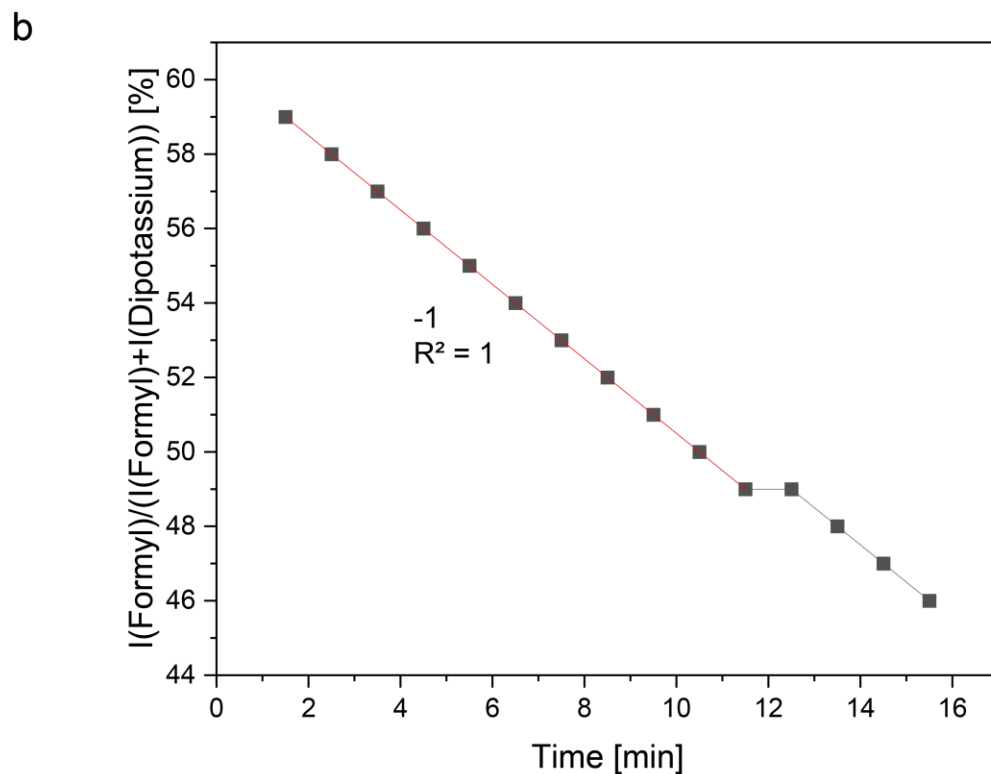

**Supplementary Figure 13. Hydrolysis of formyl phosphate.** **a** Scheme for the synthesis of formyl phosphate followed by its hydrolysis to formate and phosphate. **b** Hydrolysis rate of formyl phosphate as determined by quantitative  $^{31}\text{P}\{^1\text{H}\}$ -NMR integrals of formyl phosphate (formyl) and dipotassium phosphate (dipotassium). Only points on red line were included in linear fit. RT: room temperature. Source data are provided as a Source Data file.

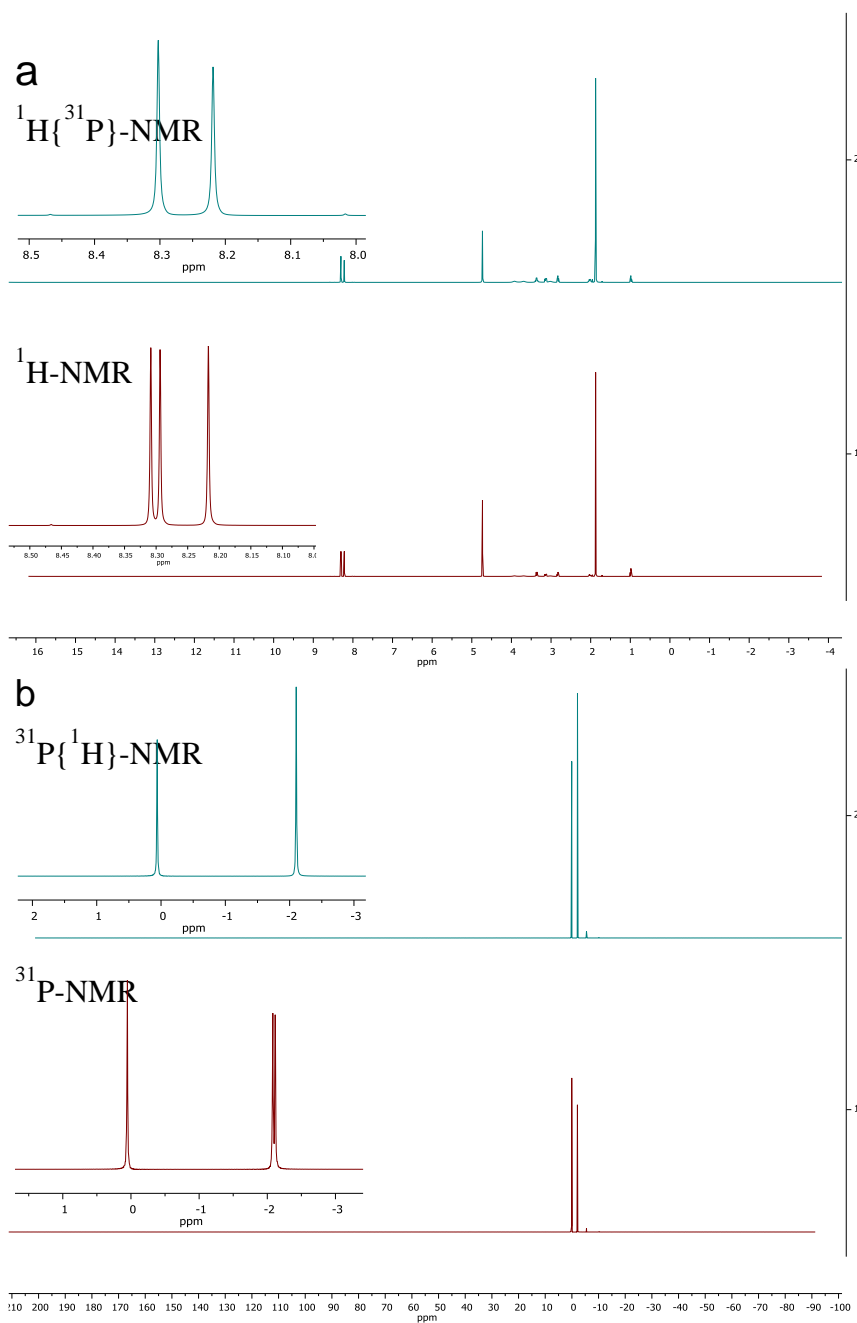

**Supplementary Figure 14. Coupled and decoupled NMR of a mixture of formyl phosphate, formic acid and phosphate.** Both the singlets at 8.3 ppm in  $^1\text{H}\{-^{31}\text{P}\}$ -NMR and the one at -2.1 ppm in  $^{31}\text{P}\{-^1\text{H}\}$ -NMR (**a** and **b** upper traces) become doublets with the same  $J_{\text{PH}}=5.8$  Hz upon shutting off the decoupler (**a** and **b** bottom traces) allowing for a clear identification of the formyl phosphate signals. As expected, the singlet at 8.2 ppm in  $^1\text{H}$ -NMR (formic acid) and the singlet at 0.1 ppm in  $^{31}\text{P}$ -NMR (dipotassium phosphate) do not split when the decoupler is shut off.



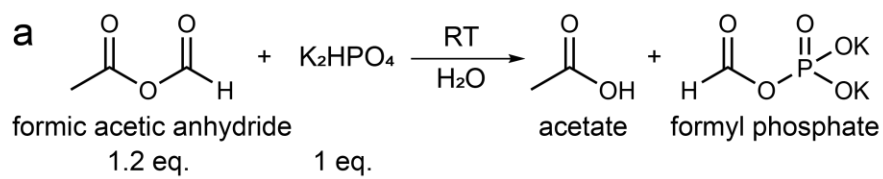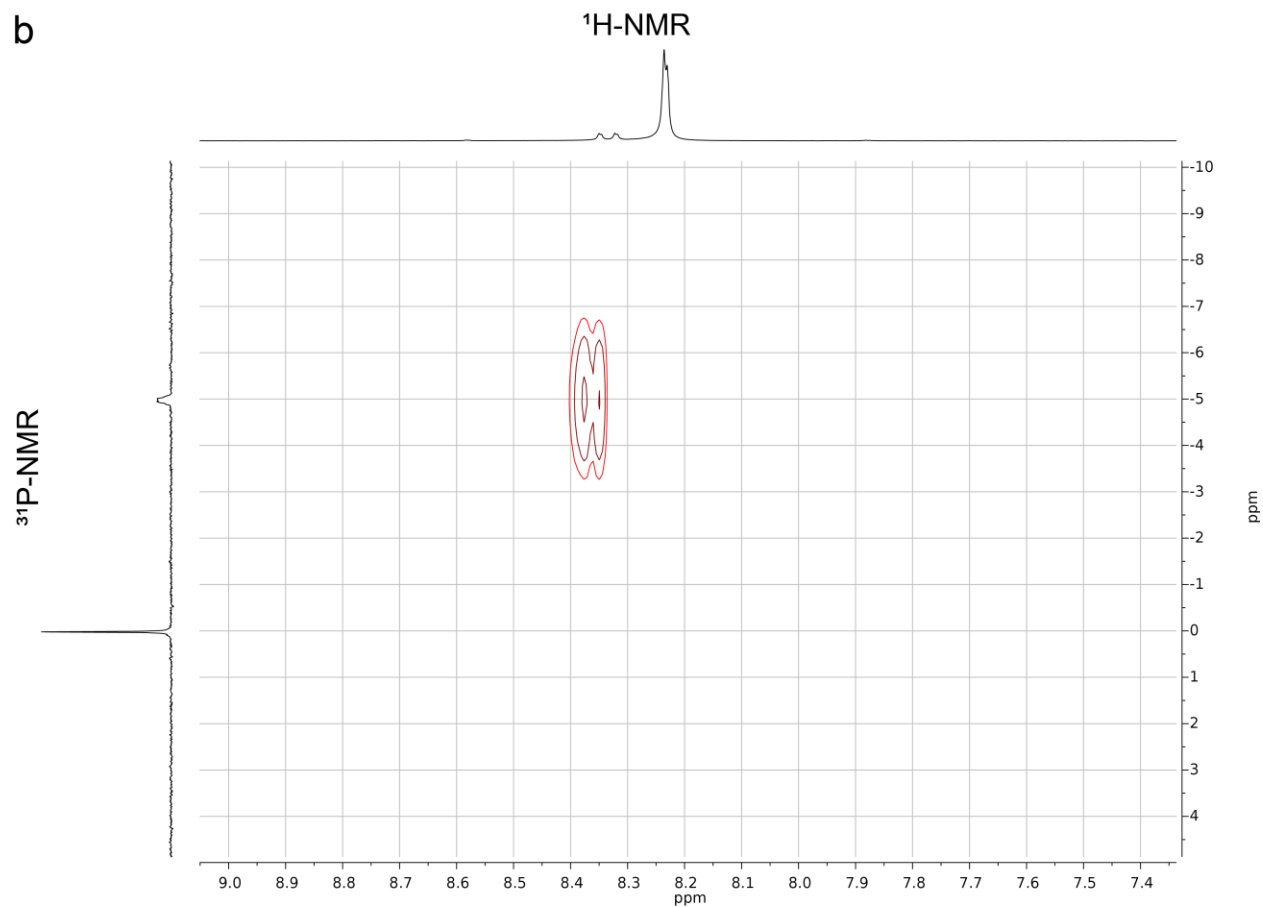

**Supplementary Figure 15. <sup>1</sup>H-<sup>31</sup>P-HMBC-NMR of formyl phosphate.** **a** Reaction conditions for the synthesis of formyl phosphate. **b** <sup>1</sup>H-<sup>31</sup>P-HMBC-NMR spectrum for formyl phosphate.

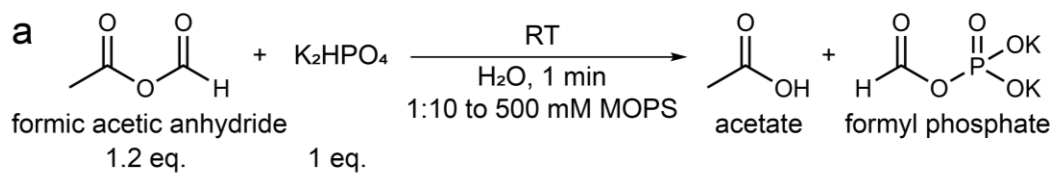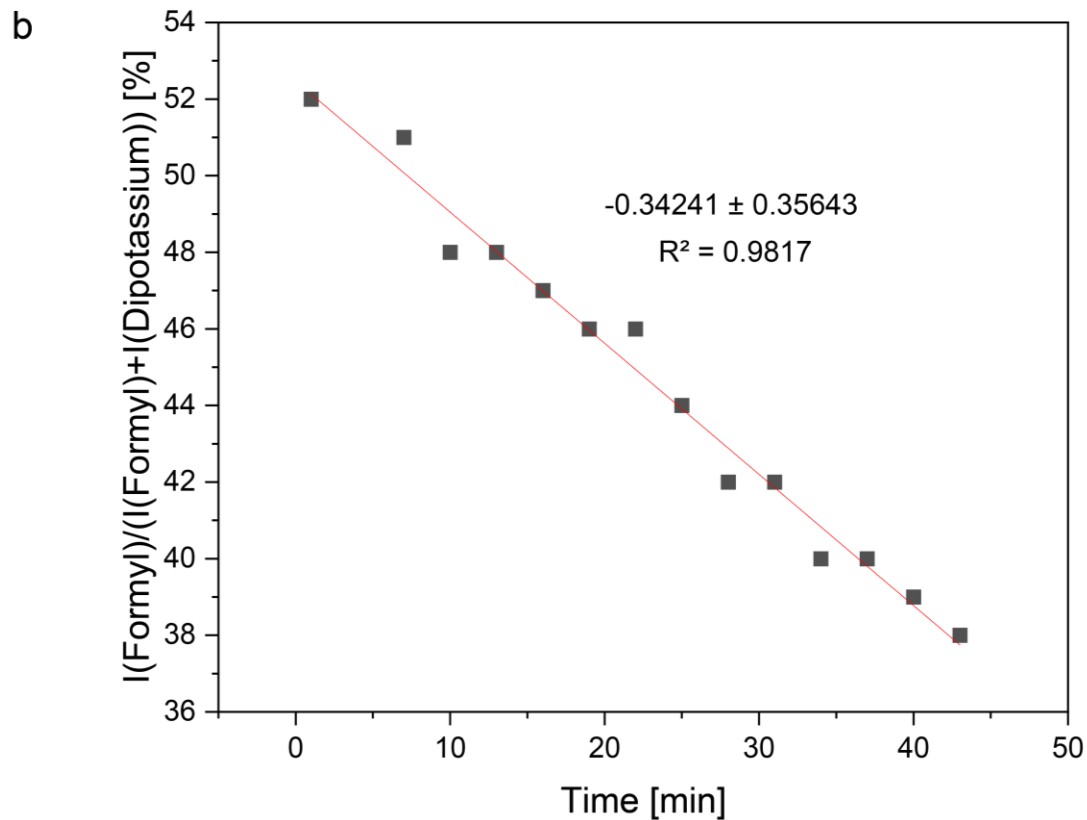

**Supplementary Figure 16. Hydrolysis of formyl phosphate under reaction conditions.** **a** Reaction conditions of formyl phosphate preparation for ArgC activity assays. **b** Hydrolysis rate of formyl phosphate as determined by quantitative  $^{31}P\{^1H\}$ -NMR integrals of formyl phosphate (formyl) and dipotassium. Source data are provided as a Source Data file.

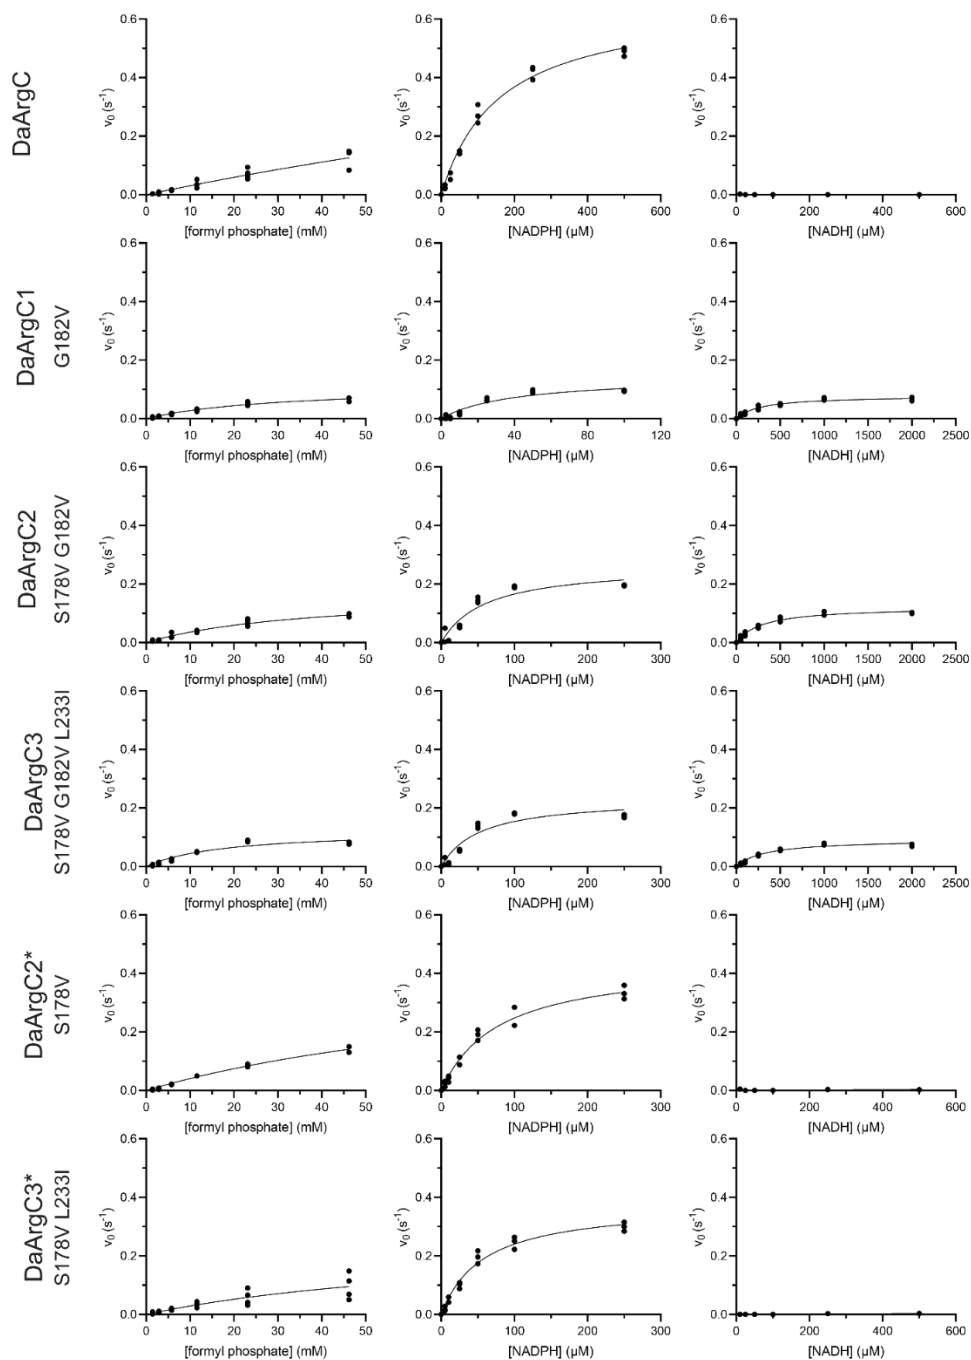

**Supplementary Figure 17. Kinetic evaluation of DaArgC variants.** Row 1: kinetics on formyl phosphate. Row 2: kinetics on NADPH, coupled to saturating concentrations of formate and non-limiting amounts of EcAckA. Row 3: kinetics on NADPH, coupled to saturating concentrations of formate and non-limiting amounts of EcAckA. Shown are individual technical replicates ( $n=4$ ) and the Michaelis Menten fit. Source data are provided as a Source Data file.

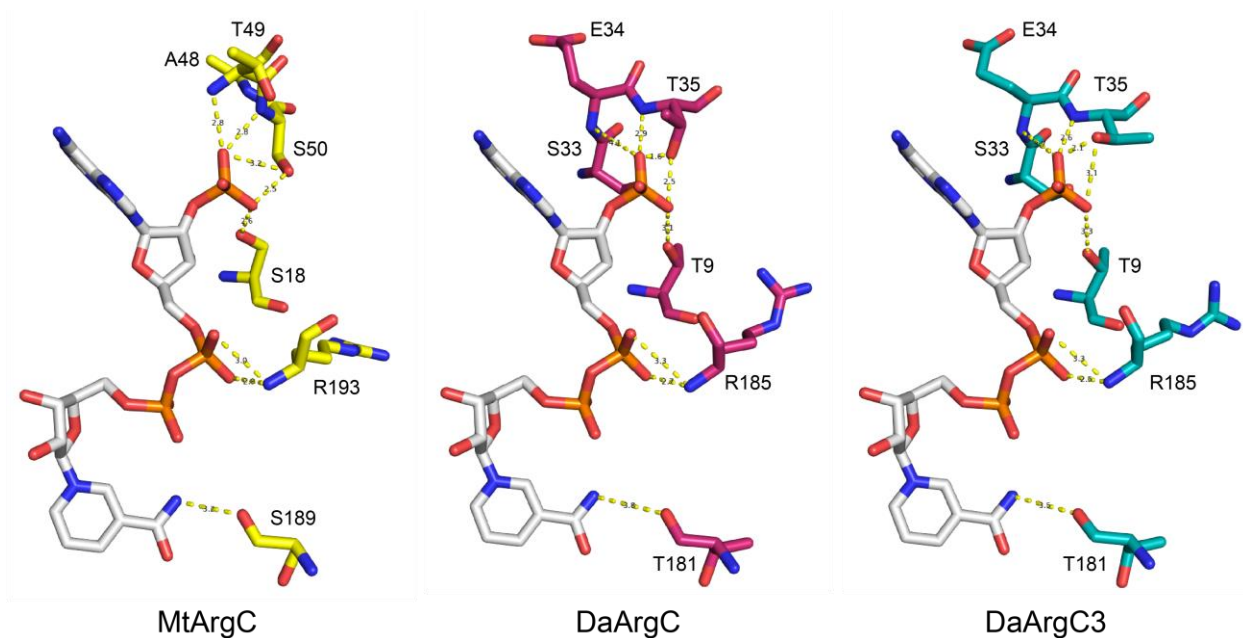

**Supplementary Figure 18. NADPH coordination by ArgC variants.** Cartoon depiction of the NADPH-binding domains of MtArgC (PBD-ID 2I3G [<http://doi.org/10.2210/pdb2i3g/pdb>]) and the putative NADPH-binding domains of DaArgC (PBD-ID 8AFU [<https://doi.org/10.2210/pdb8AFU/pdb>]) and DaArgC3 (PBD-ID 8AFV [<https://doi.org/10.2210/pdb8AFV/pdb>]). Relevant residues are labelled. DaArgC: *Denitrovibrio acetiphilus* N-acetyl- $\gamma$ -glutamyl phosphate dehydrogenase, MtArgC: *Mycobacterium tuberculosis* N-acetyl- $\gamma$ -glutamyl phosphate dehydrogenase

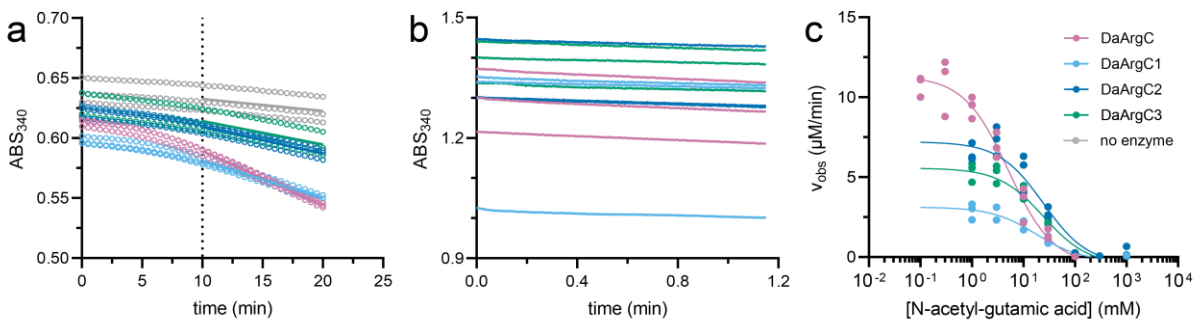

**Supplementary Figure 19. Activity of DaArgC variants on acetyl phosphate and *N*-acetyl- $\gamma$ -glutamyl phosphate, and inhibition of  $P_i$  route by *N*-acetyl- $\gamma$ -glutamic acid. **a** DaArgC activity on acetyl phosphate. Shown are individual technical replicates ( $n=3$ ) and linear fit. Dotted line indicates the time point from which the linear fit was applied. **b** DaArgC activity on *N*-acetyl- $\gamma$ -glutamyl phosphate. Shown are individual technical replicates ( $n=3$ ). **c** Inhibition of DaArgC variants by *N*-acetyl- $\gamma$ -glutamic acid. Shown are inhibitor response least squares fit and individual technical replicates ( $n=3$ ). *Denitrovibrio acetiphilus* *N*-acetyl- $\gamma$ -glutamyl phosphate dehydrogenase. Source data are provided as a Source Data file.**

>sp|P0A6A3|ACKA\_ECOLI Acetate kinase  
OS=Escherichia coli (strain K12) GN=ackA PE=1 SV=1 EcAckA  
MGSSHHHHHSQDPALRASSKLVLVLCGSSSLKFAIIDAVNGEEYLSGLAECFHLPEAR  
IKWKMDGNKQEAALGAGAAHSEALNFIVNTILAQKPELSAQLTAIGHRIVHGGEKYTSSV  
VIDESVIQGIKDAASFAPLHNPahlGIEEALKSFPQLKDKNVAVFDTAHFHQTMPPEESYL  
YALPYNLYKEHGIRRYGAHGTSFYVTQEAAKMLNKPVEELNIITCHLGNNGGSVSAIRNG  
KCVDTSMGLTPLEGLVMGTRSGDIDPAIIFHLHDTLGMSVDAINKLLTKESGLLGLTEVT  
SDCRYVEDNYATKEDAKRAMDVYCHRLAKYIGAYTALMDGRLDAVVFTGGIGENAAMVRE  
LSLGKLVGLGFEVDHERNLAARFGKSGFINKEGTRPAVVIPNEELVIAQDASRLTAGLC  
GR

>sp|X00001|DaArgC DaArgC OS=Custom GN=DaArgC PE=1 SV=1 DaArgC  
MMKVSVIGATGYTGYELVKILANHPFEIAALVSETYADKMFSVDVYPRLSICDVVITGR  
DYDAVAEISDAVFLCLPHAAAQDAAFFYEKGLKVVDVFSADFRLKDKKLYEATYKVDHTY  
PDLRKA VYGLPEIFEVDIKKAELVANPGCYPTSVITPLYPLLKADIAYSFCECNEDFRP  
YAIFSHRHNPEINEVLKGIESTIYTKTTAGLAEISACLKDFYRERRCVRIYDNGHIPSTA  
DVTDTNFIDIGLGVKGERLIIVSCIDNLIKSSGMAVQNMNLMCGFDDTLGIL

The original DaArgC sequence is shown below. Sequences removed for analysis are marked in red:

>DaArgC  
MMKVSVIGATGYTGYELVKILANHPFEIAALVSETYADKMFSVDVYPRLSICDVVITGR  
DYDAVAEISDAVFLCLPHAAAQDAAFFYEKGLKVVDVFSADFRLKDKKLYEATYKVDHTY  
PDLRKA VYGLPEIFEVDIKKAELVANPGCYPTSVITPLYPLLKAGLISPEGIADSKSG  
VTGAGRKADIAYSFCECNEDFRPYAIFSHRHNPEINEVLKETGKETNVLFTPHLIPASKG  
IESTIYTKTTAGLAEISACLKDFYRERRCVRIYDNGHIPSTADVTDTNFIDIGLGVKGER  
LIIVSCIDNLIKSSGMAVQNMNLMCGFDDTLGIL

Removed sequences coming from different isoforms are marked in red below:

>DaArgC wild type  
AGLISPEGIADSKSGVTGAGRK...ETGKETNVLFTPHLIPASK

>DaArgC1 [G182V]  
AGLISPEGIADSKSGVTVAGRK...ETGKETNVLFTPHLIPASK

>DaArgC2 [S178V;G182V]  
AGLISPEGIADSKVGVTVAGRK...ETGKETNVLFTPHLIPASK

>DaArgC3 [S178V;G182V;L233I]  
AGLISPEGIADSKVGVTVAGRK...ETGKETNVLFTPHIIPASK

**Supplementary Figure 20. Sequences used in proteomic analysis.**

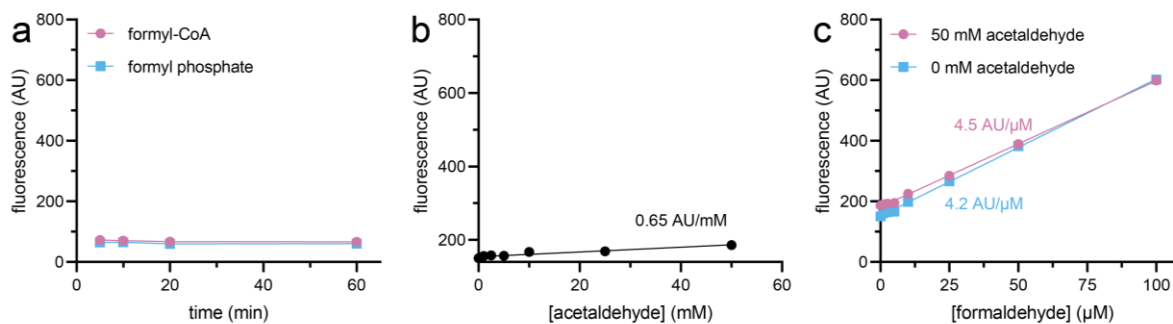

**Supplementary Figure 21. Controls for the Nash reaction.** **a** reactivity of Nash reagent with formyl-CoA and formyl phosphate. Formyl-CoA and formyl phosphate were produced *in situ* by FCS and FOK, respectively. **b** reactivity of Nash reagent with acetaldehyde. **c** Reactivity of Nash reagent with formaldehyde in the presence and absence of 50 mM acetaldehyde. For all panels, the linear fit of single measurements ( $n=1$ ) is shown. AU: arbitrary units. Source data are provided as a Source Data file.

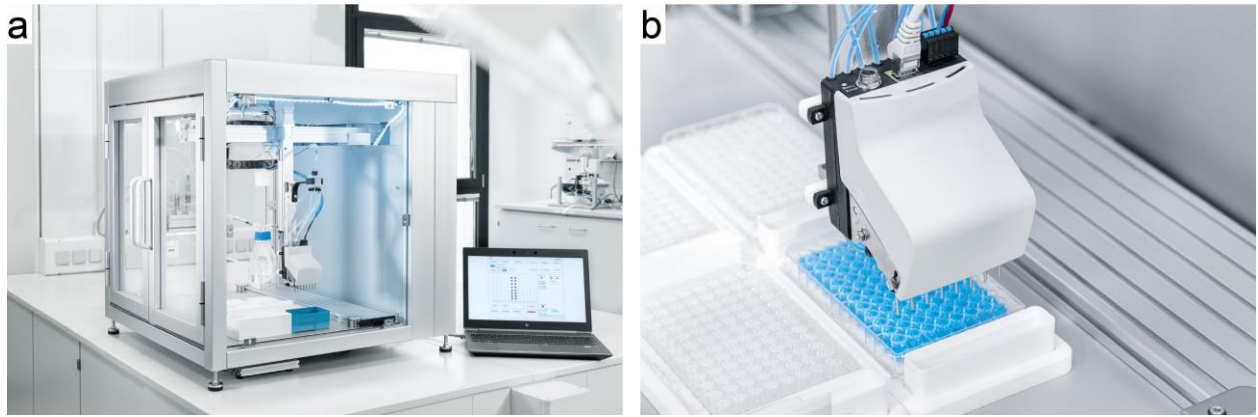

**Supplementary Figure 22. Images of the liquid handler. a** view of the entire setup. **b** close-up of the dispensing head and interior setup. Images were adapted from Festo SE & Co. KG (2022).



**Supplementary Table 1. Energy profile of formate reduction routes by eQuilibrator.**

| Reaction formula                                                   | $\Delta_rG^\circ$ (kJ/mol) | $\Delta_rG^m$ (kJ/mol) | Route |
|--------------------------------------------------------------------|----------------------------|------------------------|-------|
| formate+ATP+THF=formyl-THF+ADP+Pi                                  | -2.67                      | -5.88                  | THF   |
| formyl-THF+NADPH=methylene-THF+NADP <sup>+</sup> +H <sub>2</sub> O | -4.07                      | -4.84                  | THF   |
| formyl-THF+NADH=methylene-THF+NAD <sup>+</sup> +H <sub>2</sub> O   | -4.21                      | -4.98                  | THF   |
| methylene-THF+H <sub>2</sub> O=formaldehyde+THF                    | 25.36                      | 6.86                   | THF   |
| formate+ATP+CoA=formyl-CoA+AMP+PPi                                 | -30.95                     | -17.60                 | CoA   |
| formyl-CoA+NADPH=formaldehyde+CoA+NADP <sup>+</sup>                | 39.41                      | 8.09                   | CoA   |
| formyl-CoA+NADH=formaldehyde+CoA+NAD <sup>+</sup>                  | 39.28                      | 7.95                   | CoA   |
| formate+ATP=formyl-phosphate+ADP                                   | -15.43                     | -9.79                  | Pi    |
| formyl-phosphate+NADPH=formaldehyde+NADP <sup>+</sup> +Pi          | 34.04                      | 7.32                   | Pi    |
| formyl-phosphate+NADH=formaldehyde+NAD <sup>+</sup> +Pi            | 33.91                      | 2.78                   | Pi    |

$\Delta_rG^\circ$ : estimated change in Gibbs free energy in standard conditions;  $\Delta_rG^m$ : estimated change in Gibbs free energy in conditions pH 7.0, pMg 3.0 and ionic strength 0.25 mM, with all compounds at 1 mM concentration.

**Supplementary Table 2. Literature efficiencies of ACS and ACR variants.** Where available, standard deviation is indicated.

| Enzyme      | $K_m$ (mM)     | $k_{cat}$ ( $s^{-1}$ ) | Productivity<br>( $\mu$ M formaldehyde/s) | Publication |
|-------------|----------------|------------------------|-------------------------------------------|-------------|
| StACS       | ~ 120          | ~ 12                   |                                           | 2           |
| MhACS       | ~ 90           | ~ 6                    |                                           | 2           |
| EcACS       | ~ 50           | ~ 8                    |                                           | 2           |
| ArACS       | ~ 40           | ~ 6                    |                                           | 2           |
| TtACS       | ~ 150          | ~ 5                    |                                           | 2           |
| SdACS       | ~ 150          | ~ 9                    |                                           | 2           |
| LmACR       | $10.4 \pm 2.2$ | $0.99 \pm 0.07$        |                                           | 3           |
| ACS-BmACR   |                |                        | ~ 0.14 (lysate)                           | 2           |
| ACS-LmACR   |                |                        | ~ 0.2 (lysate)                            | 2           |
| BsACS-LmACR |                |                        | ~ 0.08 ( <i>in vitro</i> )                | 4           |
| BsACS-LmACR |                |                        | ~ 0.08 ( <i>in vitro</i> )                | 4           |

**Supplementary Table 3. Kinetic parameters of variants DaArgC2\* and DaArgC3\*.**

| Enzyme   | Formyl phosphate     |                                      |                                                     | NADPH <sup>(1)</sup> |                                      |                                                     | NADH <sup>(1)</sup>   |                                      |                                                     |
|----------|----------------------|--------------------------------------|-----------------------------------------------------|----------------------|--------------------------------------|-----------------------------------------------------|-----------------------|--------------------------------------|-----------------------------------------------------|
|          | $K_{m, app}$<br>(mM) | $k_{cat, app}$<br>(s <sup>-1</sup> ) | $k_{cat}/K_m$<br>(M <sup>-1</sup> s <sup>-1</sup> ) | $K_{m, app}$<br>(mM) | $k_{cat, app}$<br>(s <sup>-1</sup> ) | $k_{cat}/K_m$<br>(M <sup>-1</sup> s <sup>-1</sup> ) | $K_{m, app}$<br>(mM)  | $k_{cat, app}$<br>(s <sup>-1</sup> ) | $k_{cat}/K_m$<br>(M <sup>-1</sup> s <sup>-1</sup> ) |
| DaArgC2* | no fit               | 0.14 ±<br>0.01 <sup>(2)</sup>        | -                                                   | 0.08 ±<br>0.01       | 0.44 ±<br>0.02                       | 5.5*10 <sup>3</sup>                                 | >500 <sup>(3)</sup> . | <0.005 <sup>(3)</sup> .              | <1 <sup>(3)</sup>                                   |
| DaArgC3* | no fit               | 0.10 ±<br>0.05 <sup>(2)</sup>        | -                                                   | 0.06 ±<br>0.01       | 0.38 ±<br>0.02                       | 6.3*10 <sup>3</sup>                                 | >500 <sup>(3)</sup> . | <0.005 <sup>(3)</sup> .              | <1 <sup>(3)</sup>                                   |

Parameters were determined by Michaelis Menten fit (see Supplementary Fig. 15). Standard error of independent technical triplicates (n=3) is indicated. <sup>(1)</sup> indicates measurements coupled to EcAckA. <sup>(2)</sup> maximal activity observed, [formyl-phosphate]=46 mM. <sup>(3)</sup> activity below detection limit.

**Supplementary Table 4. Bacterial strains.**

| Strain                                             | Genotype                                                                                                                                                                                                                                     | Use                                       | Source                         |
|----------------------------------------------------|----------------------------------------------------------------------------------------------------------------------------------------------------------------------------------------------------------------------------------------------|-------------------------------------------|--------------------------------|
| <i>E. coli</i> BL21 (DE3)                          | <i>E. coli str. F<sup>-</sup> ompT gal dcm lon</i><br><i>hsdS<sub>B</sub>(r<sub>B</sub><sup>-</sup>m<sub>B</sub><sup>-</sup>) λ(DE3 [lacI lacUV5-<br/>T7p07 ind1 sam7 nin5]) [malB<sup>+</sup>]<sub>K</sub>.</i><br><i>12(λ<sup>S</sup>)</i> | protein production                        | Invitrogen                     |
| <i>E. coli</i> BL21 (DE3)<br><i>ΔfrmRAB</i>        | <i>E. coli</i> BL21 (DE3) <i>ΔfrmRAB::Kan</i>                                                                                                                                                                                                | protein production                        | Ari Satanowski,<br>MPI Marburg |
| <i>E. coli</i> BL21 (DE3)<br><i>ΔfrmRAB ΔpflAB</i> | <i>E. coli</i> BL21 (DE3) <i>ΔfrmRAB</i><br><i>ΔpflAB</i>                                                                                                                                                                                    | protein production                        | This study                     |
| <i>E. coli</i> DH5α                                | <i>E. coli</i> F <sup>-</sup> <i>φ80lacZΔM15</i><br><i>Δ(lacZYA-argF)U169 recA1</i><br><i>endA1 hsdR17(r<sub>K</sub><sup>-</sup>, m<sub>K</sub><sup>+</sup>) phoA</i><br><i>supE44 λ<sup>-</sup> thi-1 gyrA96 relA1</i>                      | vector propagation, cloning               | Invitrogen                     |
| <i>E. coli</i> AC440                               | <i>E. coli</i> MG1655(DE3) <i>ΔfrmA</i><br><i>ΔfdhF ΔfdnG ΔfdoG ΔglcD::FRT</i>                                                                                                                                                               | resting cell bioconversion                | <sup>3</sup>                   |
| <i>E. coli</i> AC440 <i>ΔpatZ</i>                  | <i>E. coli</i> MG1655(DE3) <i>ΔfrmA</i><br><i>ΔfdhF ΔfdnG ΔfdoG ΔglcD::FRT</i><br><i>ΔpatZ</i>                                                                                                                                               | resting cell bioconversion<br>(for BsACS) |                                |

**Supplementary Table 5. Data collection and refinement statistics.** Values in parentheses are for highest-resolution shell.

|                                                     | DaArgC                     | DaArgC3                                        |
|-----------------------------------------------------|----------------------------|------------------------------------------------|
| <b>Data collection</b>                              |                            |                                                |
| Beam line                                           | ESRF ID30B                 | ESRF ID30B                                     |
| Wavelength (Å)                                      | 0.97625                    | 0.97625                                        |
| Space group                                         | I 2                        | P 2 <sub>1</sub> 2 <sub>1</sub> 2 <sub>1</sub> |
| <b>Cell dimensions</b>                              |                            |                                                |
| <i>a</i> , <i>b</i> , <i>c</i> (Å)                  | 86.7, 77.8, 122.0          | 91.9, 109.6, 133.2                             |
| $\alpha$ , $\beta$ , $\gamma$ (°)                   | 90.0, 92.9, 90.0           | 90.0, 90.0, 90.0                               |
| Unique reflections                                  | 55250 (5200)               | 66892 (6707)                                   |
| Resolution (Å)                                      | 42.69 - 1.99 (2.06 - 1.99) | 42.31 - 2.194 (2.27 - 2.19)                    |
| <i>R</i> <sub>merge</sub>                           | 0.02854 (0.2347)           | 0.03863 (0.1318)                               |
| <i>I</i> / $\sigma$ ( <i>I</i> )                    | 13.45 (2.91)               | 13.50 (5.56)                                   |
| CC <sub>1/2</sub>                                   | 0.999 (0.936)              | 0.996 (0.952)                                  |
| Completeness (%)                                    | 99.13 (93.33)              | 96.33 (97.87)                                  |
| Redundancy                                          | 6.5 (6.5)                  | 3.2 (3.2)                                      |
| <b>Refinement</b>                                   |                            |                                                |
| No. reflections                                     | 55208 (5191)               | 66884 (6707)                                   |
| <i>R</i> <sub>work</sub> / <i>R</i> <sub>free</sub> | 0.1843/0.2152              | 0.1883/0.2069                                  |
| <b>No. atoms (non-hydrogen)</b>                     |                            |                                                |
| Protein                                             | 5217                       | 10023                                          |
| Ligand/ion                                          | 2 Na <sup>+</sup>          | 4 Na <sup>+</sup>                              |
| Water                                               | 220                        | 534                                            |
| <b><i>B</i>-factors (average)</b>                   |                            |                                                |
| Protein                                             | 45.76                      | 38.56                                          |
| Ligand/ion                                          | 45.62                      | 38.44                                          |
| Water                                               | 35.60                      | 32.98                                          |
| Water                                               | 49.11                      | 40.84                                          |
| <b>R.m.s. deviations</b>                            |                            |                                                |
| Bond lengths (Å)                                    | 0.014                      | 0.004                                          |
| Bond angles (°)                                     | 1.220                      | 0.680                                          |
| Rotamer outliers (%)                                | 0.35                       | 0.37                                           |
| Ramachandran favored (%)                            | 97.45                      | 96.26                                          |
| Ramachandran outliers (%)                           | 0.30                       | 0.31                                           |
| PDB ID                                              | 8AFU                       | 8AFV                                           |

**Supplementary Table 6. Parameter settings for LC-MS detection of glycolyl-CoA.**

| Compound     | Quantifier  | Collision energy | Qualifier   | Collision energy | Dwell | Fragmenter voltage | Cell accelerator volatege |
|--------------|-------------|------------------|-------------|------------------|-------|--------------------|---------------------------|
| Glycolyl-CoA | 826.1→319.4 | 24               | 826.1→428.4 | 25               | 200   | 140                | 5                         |

**Supplementary Table 7. Bacterial strains for resting cell bioconversion.**

| Route                               | Strain                               | Plasmids                                                                          |
|-------------------------------------|--------------------------------------|-----------------------------------------------------------------------------------|
| EcAckA+DaArgC+LmACR+BsmHACL+EcAldA  | <i>E. coli</i> AC440                 | pCDFDuet-1_BsmHACL_DaArgC<br>pETDuet-1_P <sup>CT5</sup> _LmACR-ecAckA-<br>ecAldA  |
| EcAckA+DaArgC3+LmACR+BsmHACL+EcAldA | <i>E. coli</i> AC440                 | pCDFDuet-1_BsmHACL_DaArgC3<br>pETDuet-1_P <sup>CT5</sup> _LmACR-EcAckA-<br>EcAldA |
| BsACS+LmACR+BsmHACL+EcAldA          | <i>E. coli</i> AC440<br><i>ΔpatZ</i> | pCDFDuet-1_BsmHACL_BsACS<br>pETDuet-1_P <sup>CT5</sup> _LmACR-EcAldA              |

## Supplementary references

- <sup>1</sup> Krimen, L. I. Acetic formic anhydride. *Org. Synth.* **50**, 1-2 (1970).
- <sup>2</sup> Wang, J., Anderson, K., Yang, E., He, L. & Lidstrom, M. E. Enzyme engineering and *in vivo* testing of a formate reduction pathway. *Synth. Biol.* **6**, ysab020 (2021).
- <sup>3</sup> Chou, A., Clomburg, J. M., Qian, S. & Gonzalez, R. 2-Hydroxyacyl-CoA lyase catalyzes acyloin condensation for one-carbon bioconversion. *Nat. Chem. Biol.* **15**, 900-906 (2019).
- <sup>4</sup> Hu, G. *et al.* Synergistic metabolism of glucose and formate increases the yield of short-chain organic acids in *Escherichia coli*. *ACS Synth. Biol.* **11**, 135-143 (2022).
