# Supplementary material for: Engineering a new-to-nature cascade for phosphate-dependent formate to formaldehyde conversion in vitro and in vivo
Source: PubMed Central journal article supplement (PMC10170137; doi:10.1038/s41467-023-38072-w), 2023-05-09
Supplement: 41467_2023_38072_MOESM2_ESM.pdf [file 41467_2023_38072_MOESM2_ESM.pdf]

### **Description of Additional Supplementary Files**

File Name: Supplementary Data 1

Description: Reagents.

File Name: Supplementary Data 2

Description: Plasmids.

File Name: Supplementary Data 3

Description: Primers.

File Name: Supplementary Data 4

Description: Golden Gate construction.
